# Supplementary material
Source: Royal Society of Chemistry journal article supplement (doi:10.1039/d6py00080k)
Supplement: d6py00080k1.pdf [file d6py00080k1.pdf]

## Supporting information

### Dynamic cross-linked Latent Accelerators Featuring Dual-Dynamic Urea Bonds for One-Component Epoxy Systems

#### contents

|                                                                                                                              |    |
|------------------------------------------------------------------------------------------------------------------------------|----|
| Supporting Figures.....                                                                                                      | 3  |
| Fig. S1 SEM images of DICY. ....                                                                                             | 3  |
| Fig. S2 SEM images and statistical particle size of IEM-DtBIM-0.25.....                                                      | 3  |
| Fig. S3 SEM images and statistical particle size of IEM-DtBIM-0.50.....                                                      | 4  |
| Fig. S4 SEM images and statistical particle size of IEM-DtBIM-0.75.....                                                      | 4  |
| Fig. S5 FTIR spectra of IEM-DtBIM-x. ....                                                                                    | 4  |
| Fig. S6 Dissolution experiment of IEM-DtBIM-0.25 in different solvents at room temperature for 0 day.....                    | 5  |
| Fig. S7 Dissolution experiment of IEM-DtBIM-0.50 in different solvents at room temperature for 0 day.....                    | 5  |
| Fig. S8 Dissolution experiment of IEM-DtBIM-0.75 in different solvents at room temperature for 0 day.....                    | 5  |
| Fig. S9 Dissolution experiment of IEM-DtBIM-0.25 in different solvents at room temperature for 45 days. ..                   | 5  |
| Fig. S10 Dissolution experiment of IEM-DtBIM-0.50 in different solvents at room temperature for 45 days. 6                   | 6  |
| Fig. S11 Dissolution experiment of IEM-DtBIM-0.75 in different solvents at room temperature for 45 days. 6                   | 6  |
| Fig. S12 Storage modulus and loss modulus of E-D-IM under non-isothermal rheology.....                                       | 6  |
| Fig. S13 Storage modulus and loss modulus of E-D-ID0.25 under non-isothermal rheology. ....                                  | 7  |
| Fig. S14 Storage modulus and loss modulus of E-D-ID0.50 under non-isothermal rheology. ....                                  | 7  |
| Fig. S15 Storage modulus and loss modulus of E-D-ID0.75 under non-isothermal rheology. ....                                  | 7  |
| Fig. S16 Storage modulus and loss modulus of E-D under non-isothermal rheology.....                                          | 8  |
| Fig. S17 Cross-linking degree of E-D-ID0.25 calculated from isothermal DSC curves at different temperatures for 60 min. .... | 8  |
| Fig. S18 Cross-linking degree of E-D-ID0.50 calculated from isothermal DSC curves at different temperatures for 60 min. .... | 9  |
| Fig. S19 Cross-linking degree of E-D-ID0.75 calculated from isothermal DSC curves at different temperatures for 60 min. .... | 9  |
| Fig. S20 Complex viscosity of E-D-ID0.25 after different storage times at room temperature. ....                             | 10 |

|                                                                                                                                                                                                              |    |
|--------------------------------------------------------------------------------------------------------------------------------------------------------------------------------------------------------------|----|
| Fig. S21 Complex viscosity of E-D-ID0.50 after different storage times at room temperature. ....                                                                                                             | 11 |
| Fig. S22 Complex viscosity of E-D-ID0.75 after different storage times at room temperature. ....                                                                                                             | 12 |
| Fig. S23 Non-isothermal DSC curves of E-D-ID0.25 are obtained by pre-curing at 120 °C for 0.5 h, followed by hot pressing at 130 °C for 0.5 h, and post-curing in a vacuum furnace at 150 °C for 1-3 h. .... | 13 |
| Fig. S24 Non-isothermal DSC curves of E-D-ID0.75 are obtained by pre-curing at 120 °C for 0.5 h, followed by hot pressing at 130 °C for 0.5 h, and post-curing in a vacuum furnace at 150 °C for 1-3 h. .... | 13 |
| Fig. S25 Non-isothermal DSC curves of E-D-IM for different heating rates. ....                                                                                                                               | 14 |
| Fig. S26 Non-isothermal DSC curves of E-D-ID0.25 for different heating rates. ....                                                                                                                           | 14 |
| Fig. S27 Non-isothermal DSC curves of E-D-ID0.50 for different heating rates. ....                                                                                                                           | 15 |
| Fig. S28 Non-isothermal DSC curves of E-D-ID0.75 for different heating rates. ....                                                                                                                           | 15 |
| Fig. S29 Predicted $E_a$ of D-D-IM by <i>Kissinger's</i> and <i>Ozawa's</i> methods. ....                                                                                                                    | 15 |
| Fig. S30 Predicted $E_a$ of E-D-ID0.25 by <i>Kissinger's</i> and <i>Ozawa's</i> methods. ....                                                                                                                | 16 |
| Fig. S31 Predicted $E_a$ of E-D-ID0.50 by <i>Kissinger's</i> and <i>Ozawa's</i> methods. ....                                                                                                                | 16 |
| Fig. S32 Predicted $E_a$ of E-D-ID0.75 by <i>Kissinger's</i> and <i>Ozawa's</i> methods. ....                                                                                                                | 16 |
| Fig. S33 FTIR spectra of the cured E-D-IM and E-D-IDx. ....                                                                                                                                                  | 17 |
| Fig. S34 Solvent uptake test of E-D-IM and E-D-IDx by immersion in different solvents for 48 h. ....                                                                                                         | 17 |
| Fig. S35 Plot of $\tan \delta$ versus temperature. ....                                                                                                                                                      | 18 |
| Fig. S36 Plot of storage modulus versus temperature. ....                                                                                                                                                    | 18 |
| Fig. S37 Tensile stress-strain curves of E-D-IM. ....                                                                                                                                                        | 19 |
| Fig. S38 Tensile stress-strain curves of E-D-ID0.25. ....                                                                                                                                                    | 19 |
| Fig. S39 Tensile stress-strain curves of E-D-ID0.50. ....                                                                                                                                                    | 19 |
| Fig. S40 Tensile stress-strain curves of E-D-ID0.75. ....                                                                                                                                                    | 20 |

## Supporting Figures

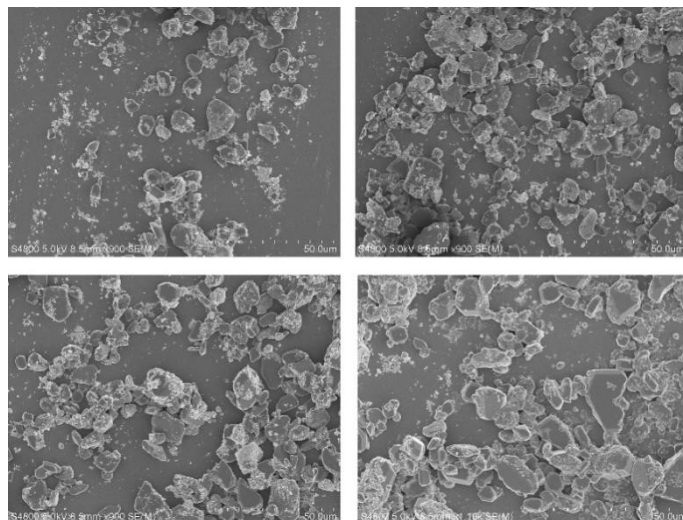

Fig. S1 SEM images of DICY.

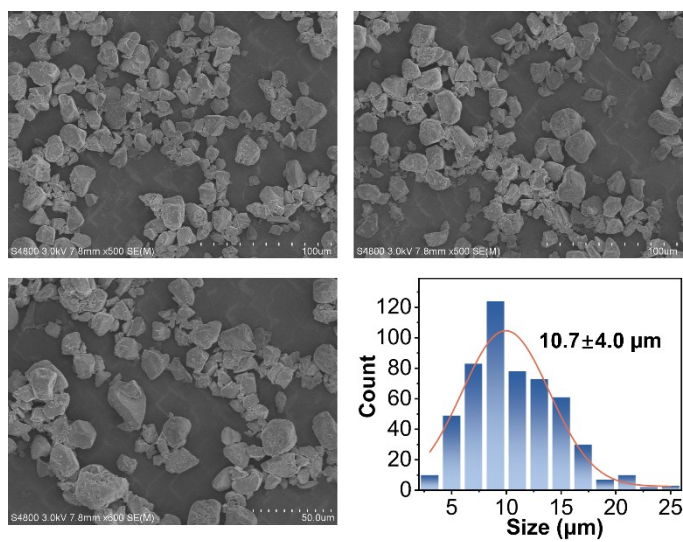

Fig. S2 SEM images and statistical particle size of IEM-DtBIM-0.25.

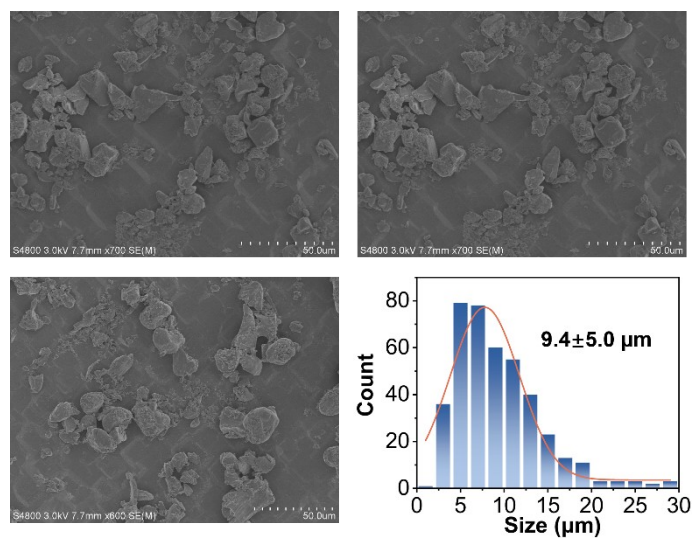

Fig. S3 SEM images and statistical particle size of IEM-DtBIM-0.50.

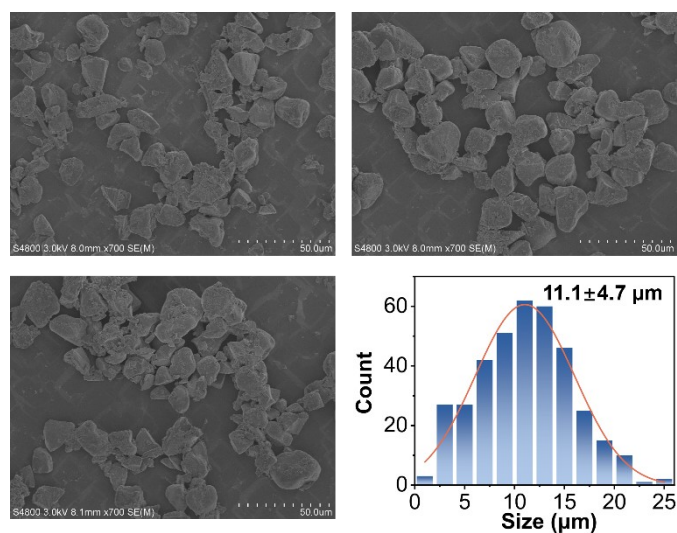

Fig. S4 SEM images and statistical particle size of IEM-DtBIM-0.75.

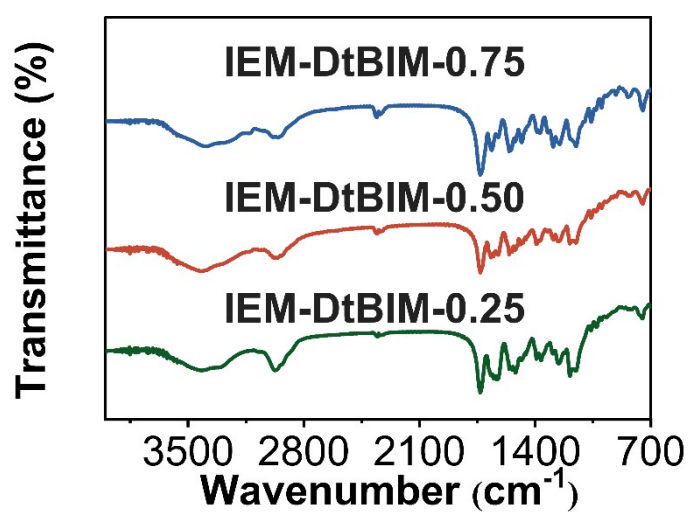

Fig. S5 FTIR spectra of IEM-DtBIM-x.

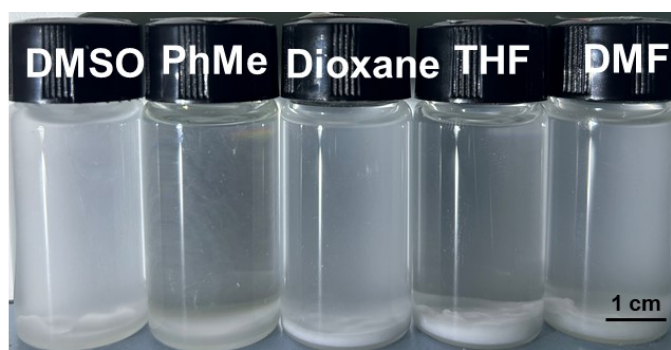

Fig. S6 Dissolution experiment of IEM-DtBIM-0.25 in different solvents at room temperature for 0 day.

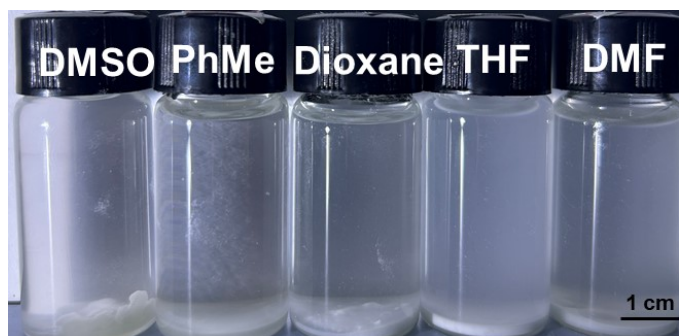

Fig. S7 Dissolution experiment of IEM-DtBIM-0.50 in different solvents at room temperature for 0 day.

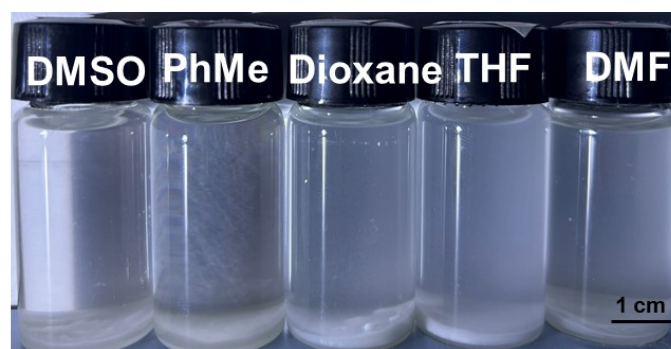

Fig. S8 Dissolution experiment of IEM-DtBIM-0.75 in different solvents at room temperature for 0 day.

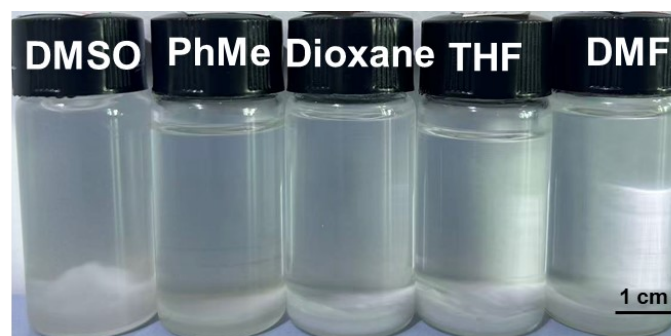

Fig. S9 Dissolution experiment of IEM-DtBIM-0.25 in different solvents at room temperature for 45 days.

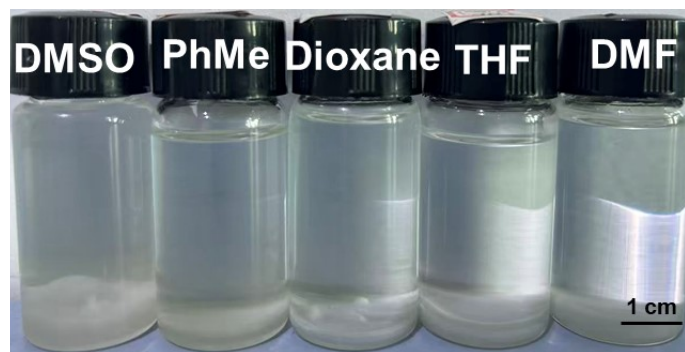

Fig. S10 Dissolution experiment of IEM-DtBIM-0.50 in different solvents at room temperature for 45 days.

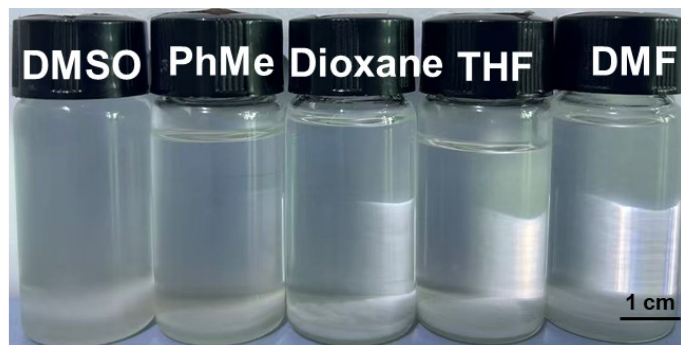

Fig. S11 Dissolution experiment of IEM-DtBIM-0.75 in different solvents at room temperature for 45 days.

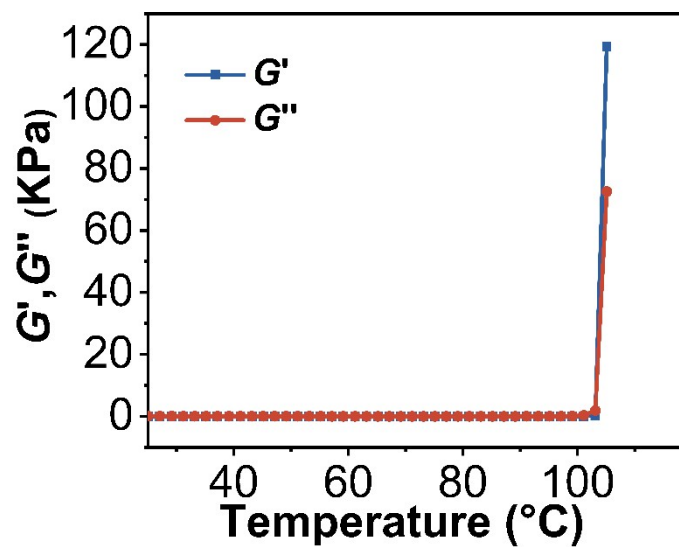

Fig. S12 Storage modulus and loss modulus of E-D-IM under non-isothermal rheology.

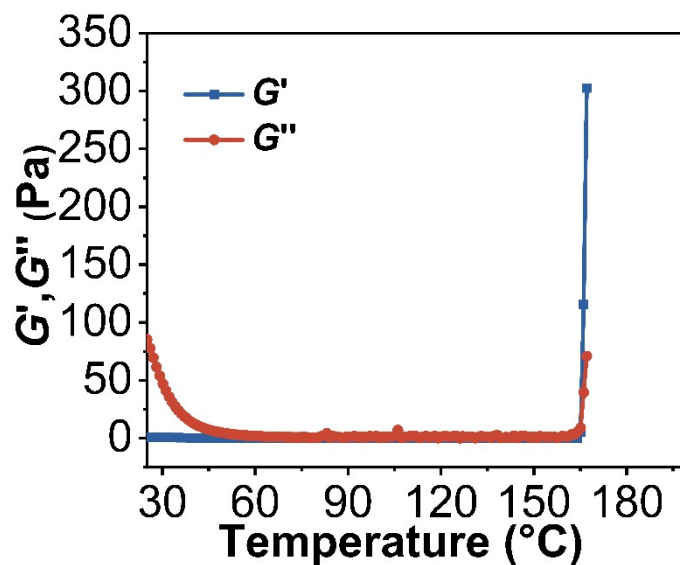

Fig. S13 Storage modulus and loss modulus of E-D-ID0.25 under non-isothermal rheology.

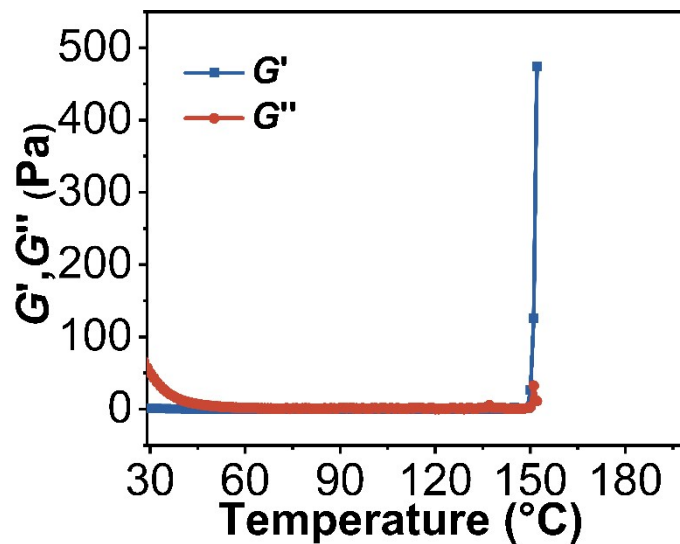

Fig. S14 Storage modulus and loss modulus of E-D-ID0.50 under non-isothermal rheology.

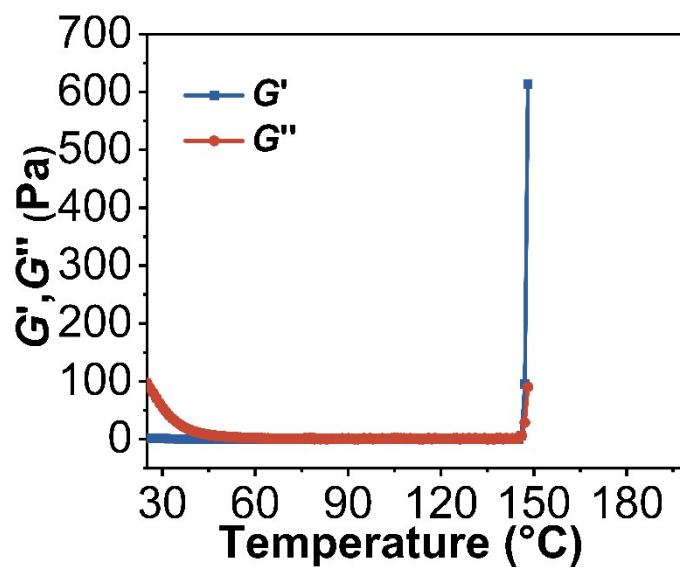

Fig. S15 Storage modulus and loss modulus of E-D-ID0.75 under non-isothermal rheology.

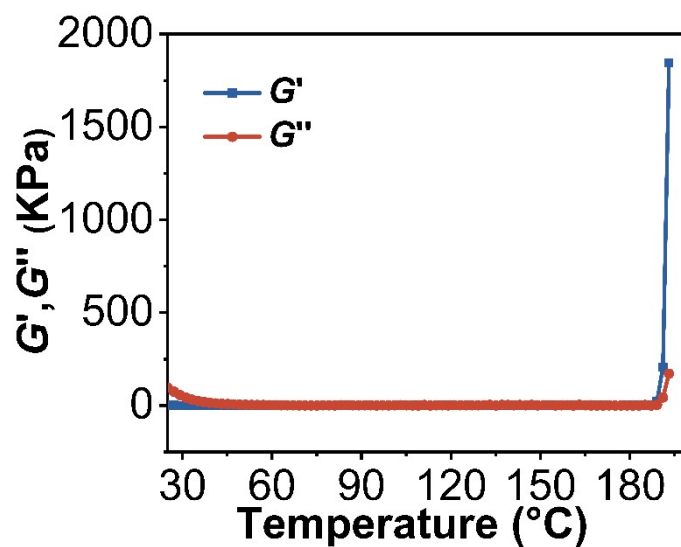

Fig. S16 Storage modulus and loss modulus of E-D under non-isothermal rheology.

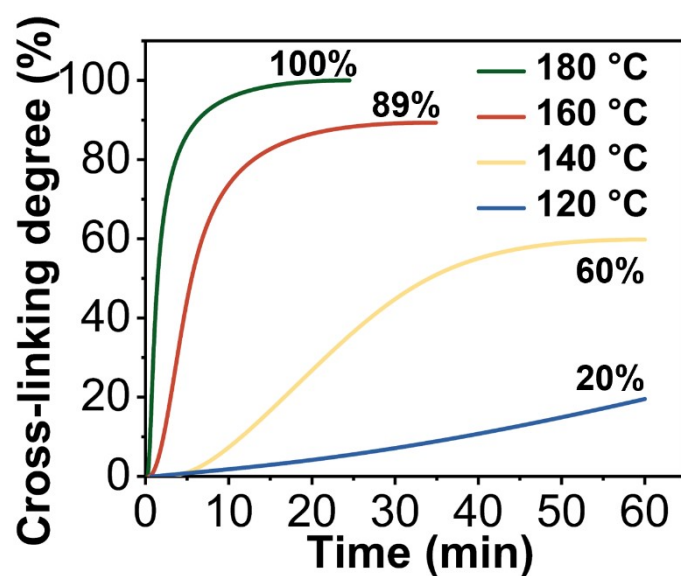

Fig. S17 Cross-linking degree of E-D-ID0.25 calculated from isothermal DSC curves at different temperatures for 60 min.

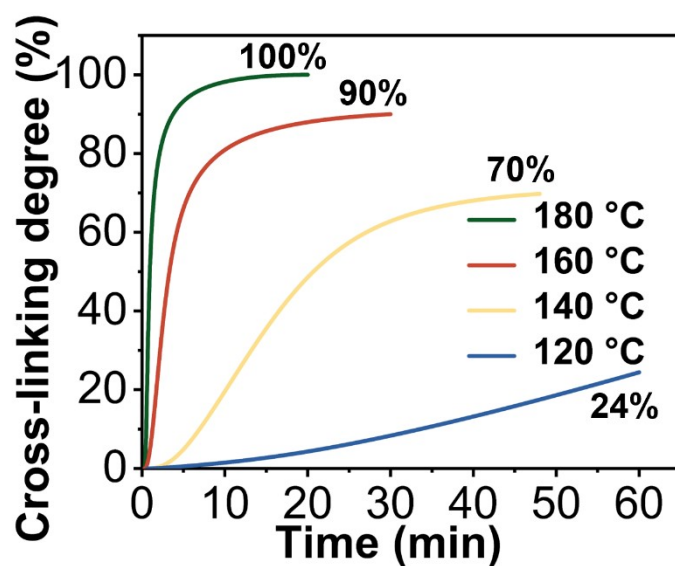

Fig. S18 Cross-linking degree of E-D-ID0.50 calculated from isothermal DSC curves at different temperatures for 60 min.

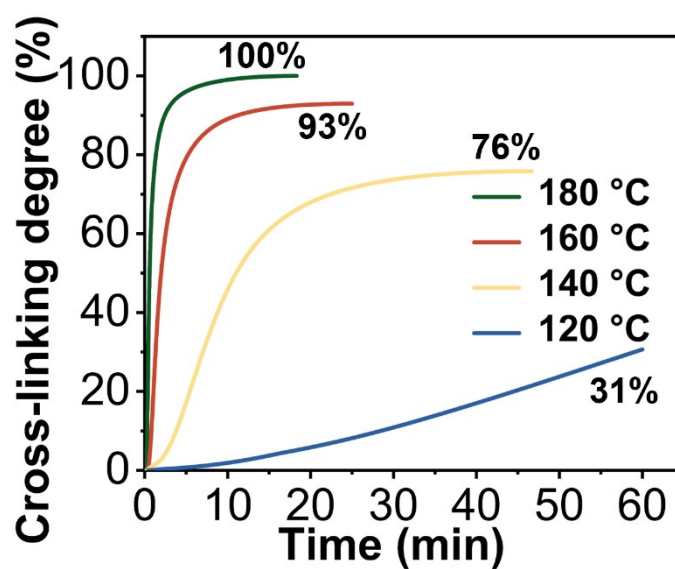

Fig. S19 Cross-linking degree of E-D-ID0.75 calculated from isothermal DSC curves at different temperatures for 60 min.

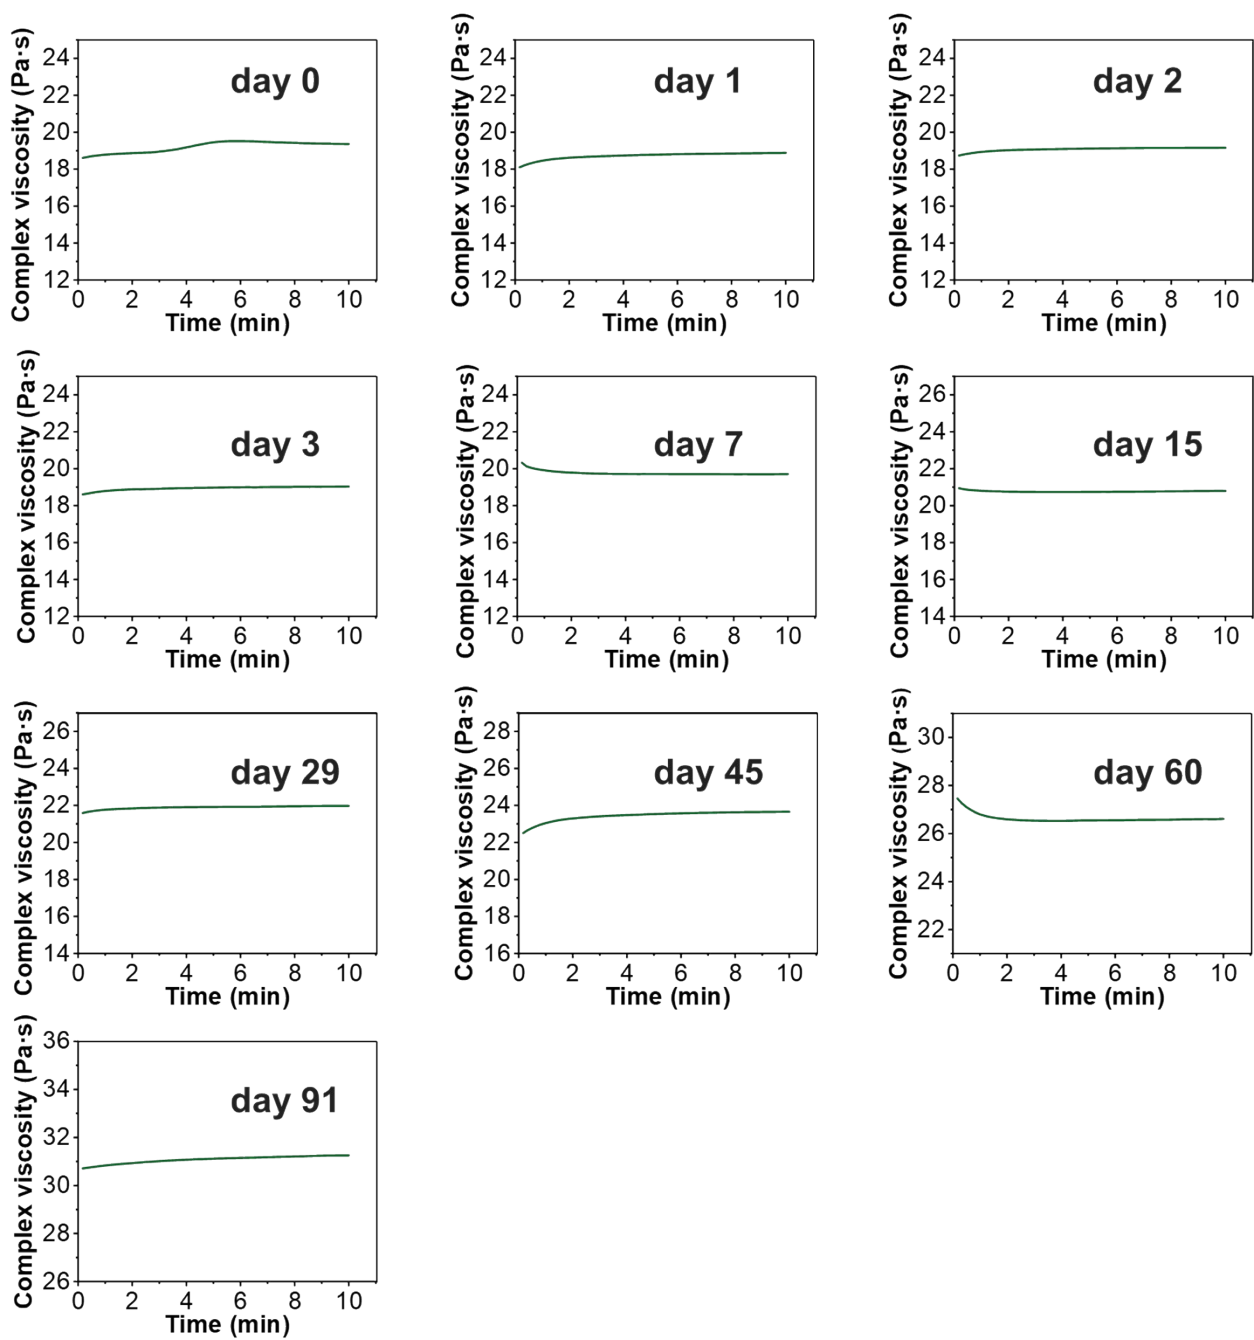

Fig. S20 Complex viscosity of E-D-ID0.25 after different storage times at room temperature.

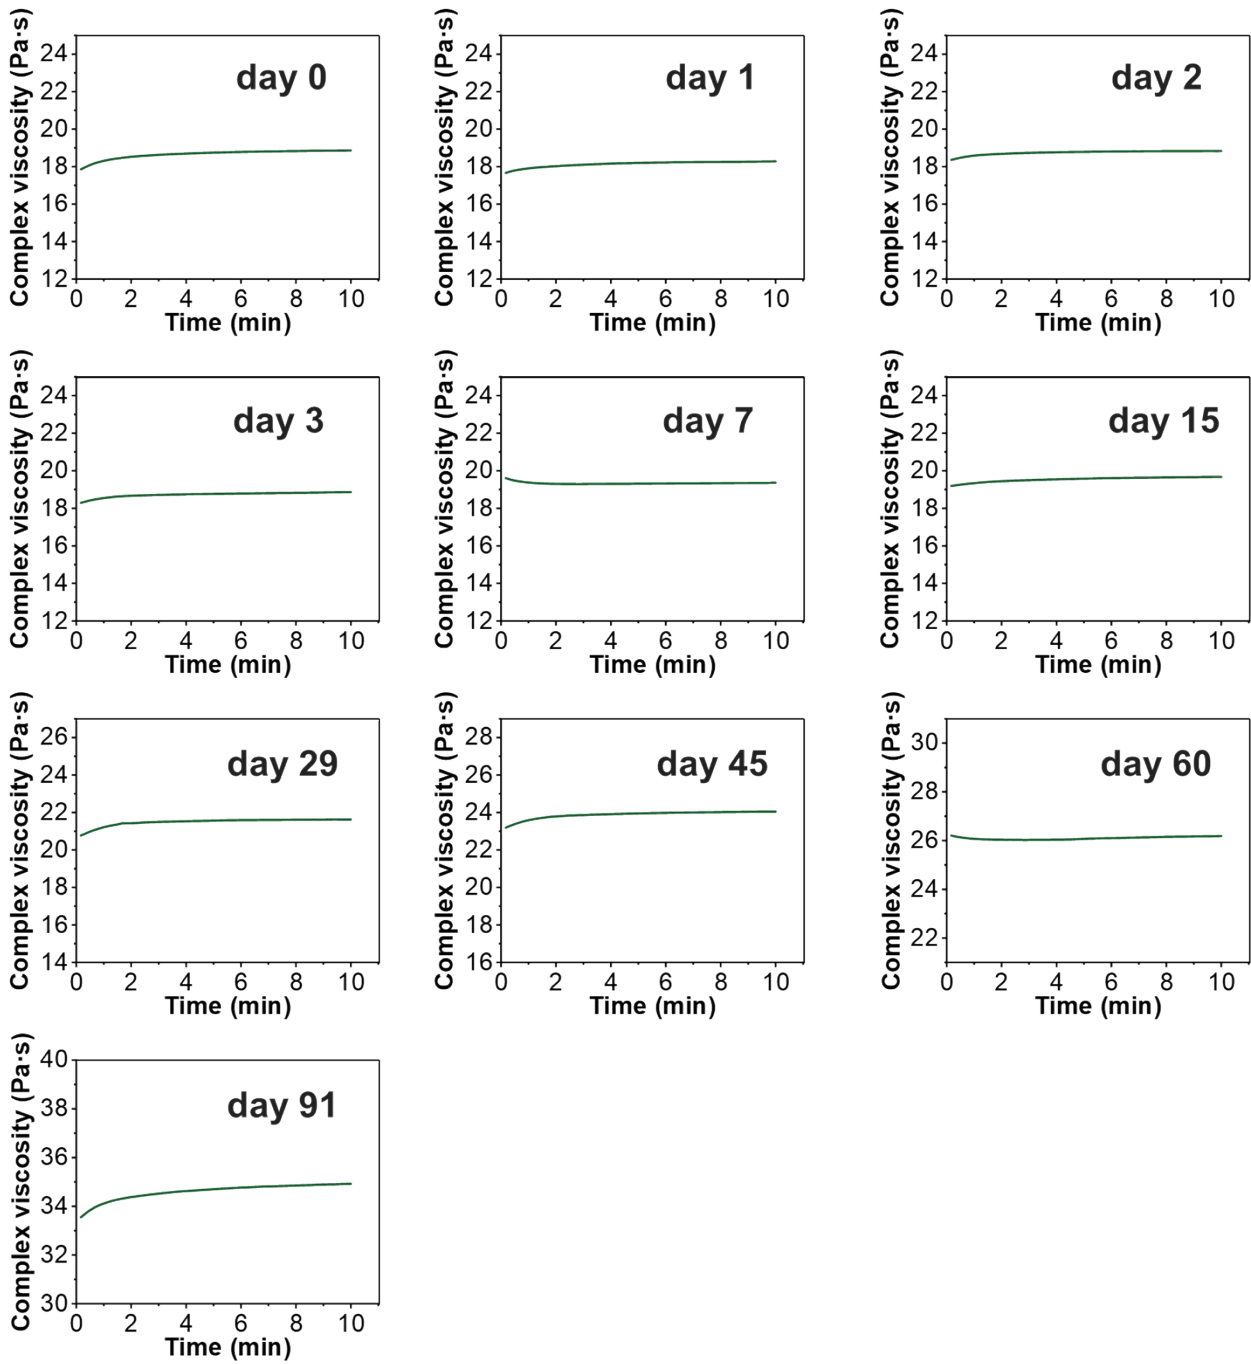

Fig. S21 Complex viscosity of E-D-ID0.50 after different storage times at room temperature.

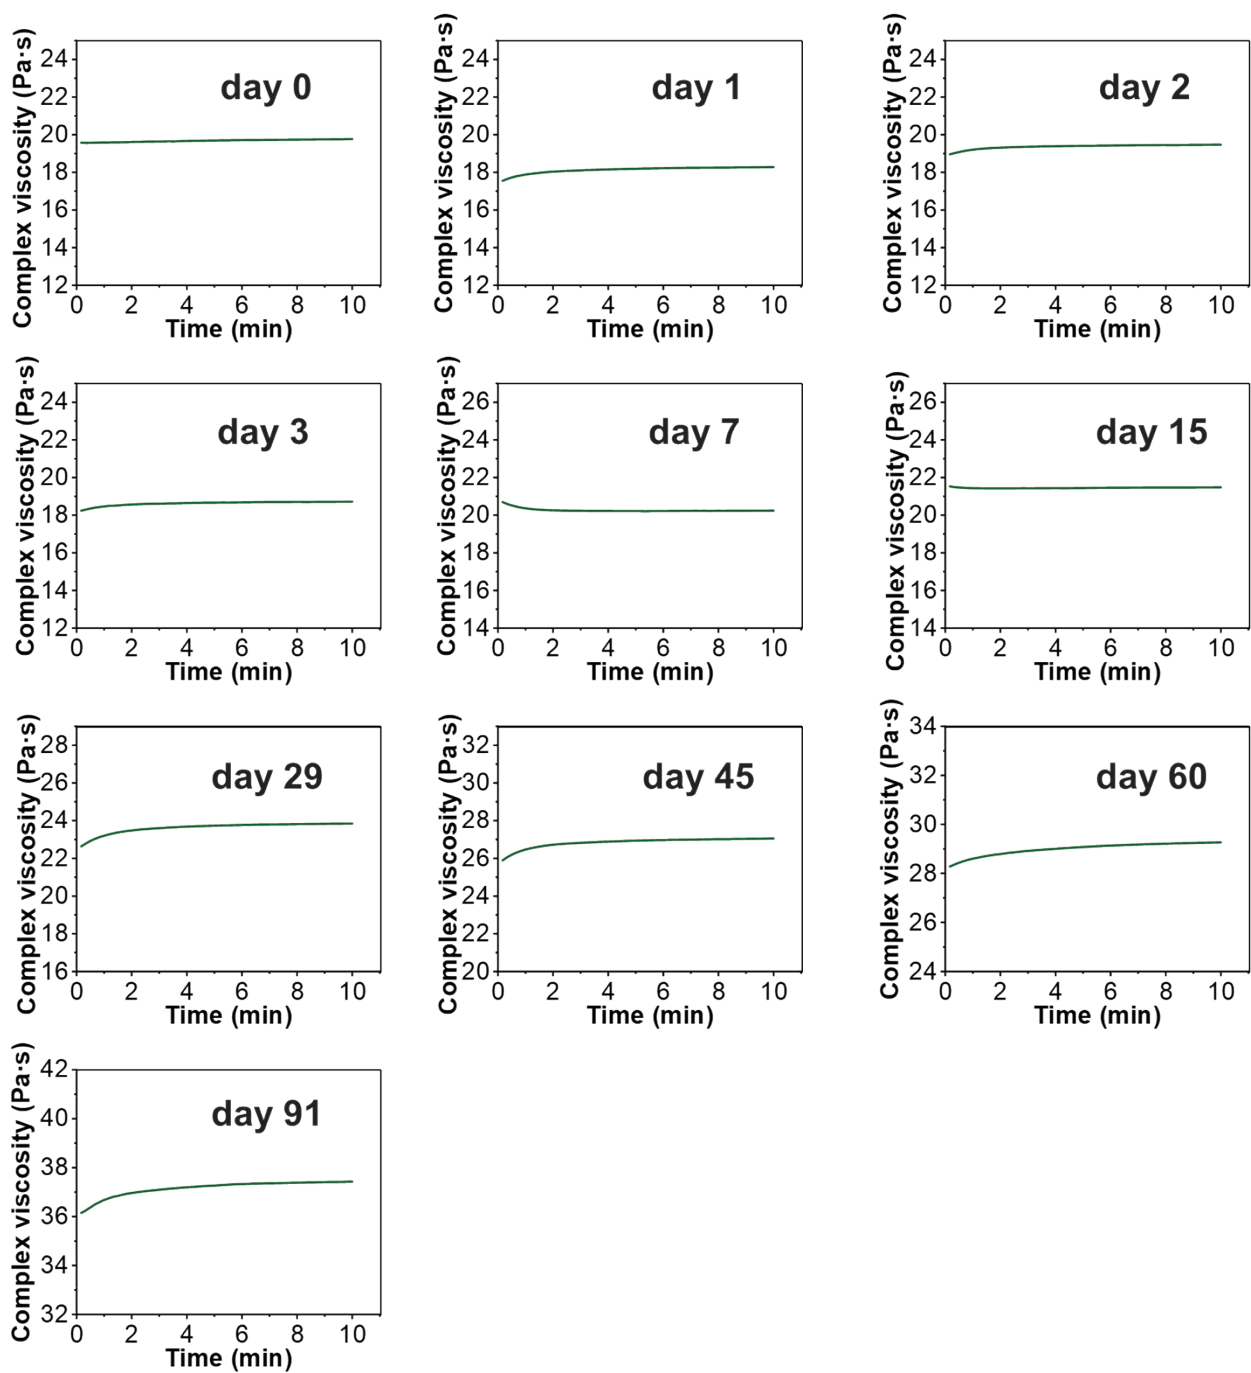

Fig. S22 Complex viscosity of E-D-ID0.75 after different storage times at room temperature.

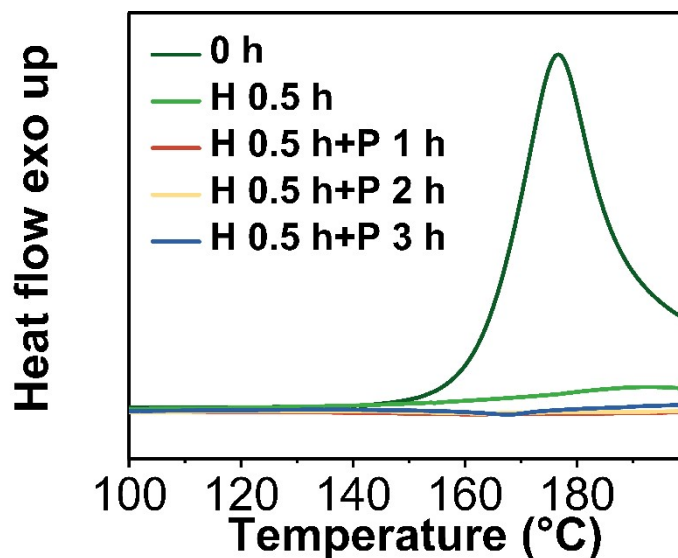

Fig. S23 Non-isothermal DSC curves of E-D-ID0.25 are obtained by pre-curing at 120 °C for 0.5 h, followed by hot pressing at 130 °C for 0.5 h, and post-curing in a vacuum furnace at 150 °C for 1-3 h.

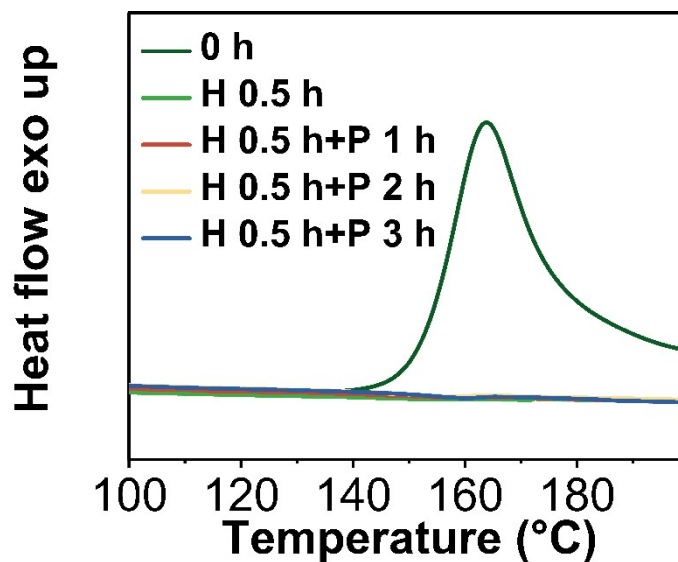

Fig. S24 Non-isothermal DSC curves of E-D-ID0.75 are obtained by pre-curing at 120 °C for 0.5 h, followed by hot pressing at 130 °C for 0.5 h, and post-curing in a vacuum furnace at 150 °C for 1-3 h.

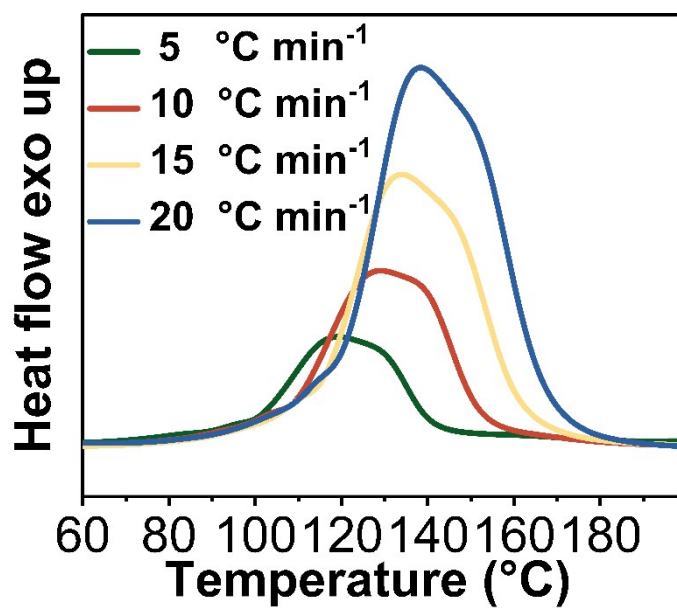

Fig. S25 Non-isothermal DSC curves of E-D-IM for different heating rates.

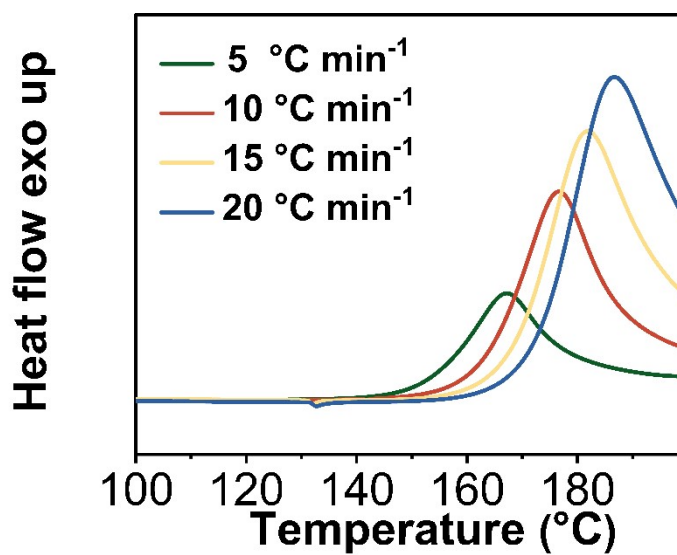

Fig. S26 Non-isothermal DSC curves of E-D-ID0.25 for different heating rates.

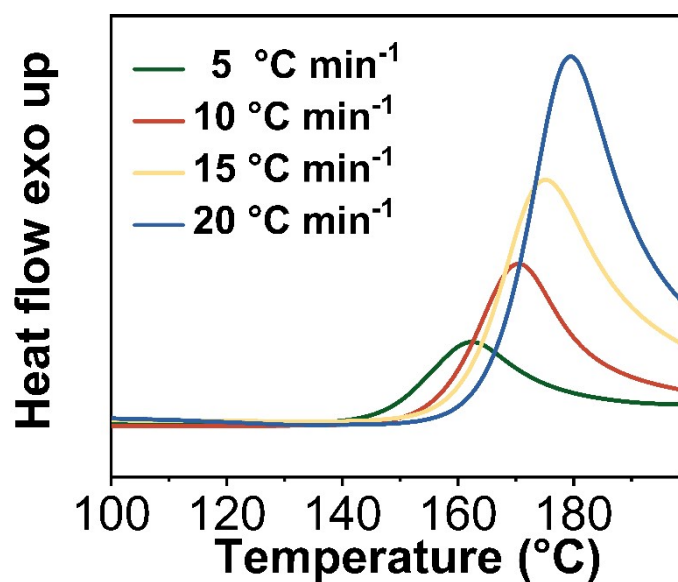

Fig. S27 Non-isothermal DSC curves of E-D-ID0.50 for different heating rates.

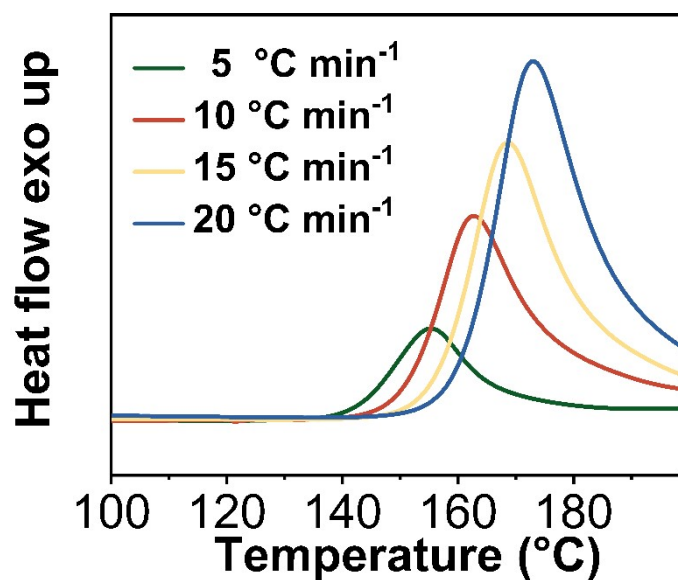

Fig. S28 Non-isothermal DSC curves of E-D-ID0.75 for different heating rates.

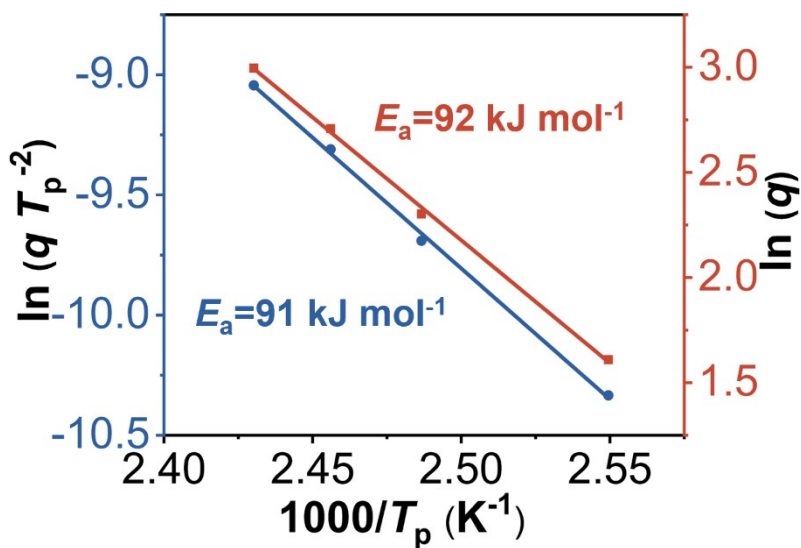

Fig. S29 Predicted  $E_a$  of D-D-IM by Kissinger's and Ozawa's methods.

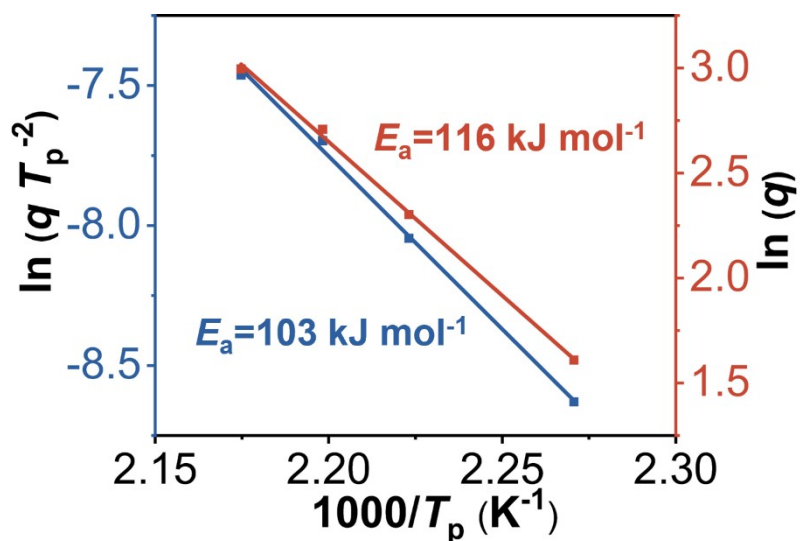

Fig. S30 Predicted  $E_a$  of E-D-ID0.25 by *Kissinger's* and *Ozawa's* methods.

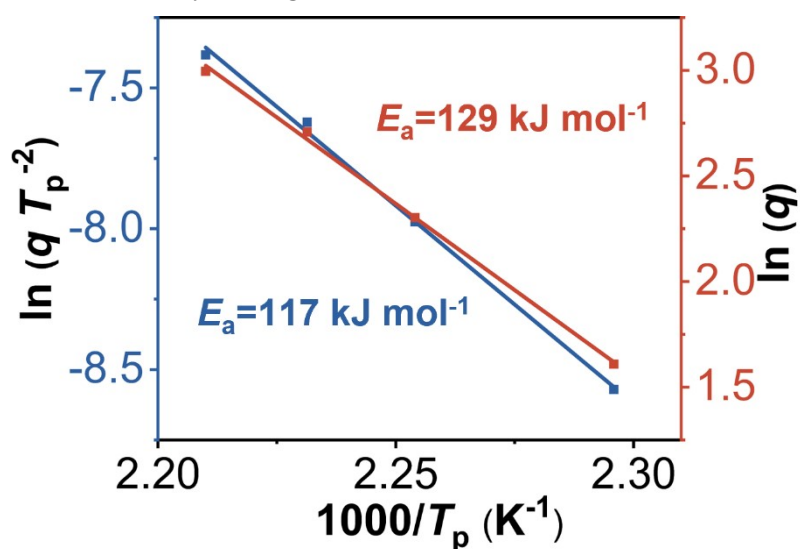

Fig. S31 Predicted  $E_a$  of E-D-ID0.50 by *Kissinger's* and *Ozawa's* methods.

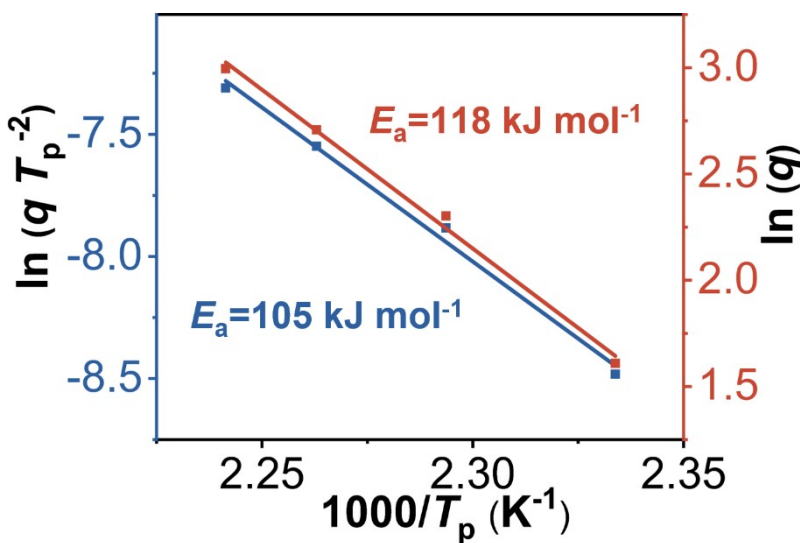

Fig. S32 Predicted  $E_a$  of E-D-ID0.75 by *Kissinger's* and *Ozawa's* methods.

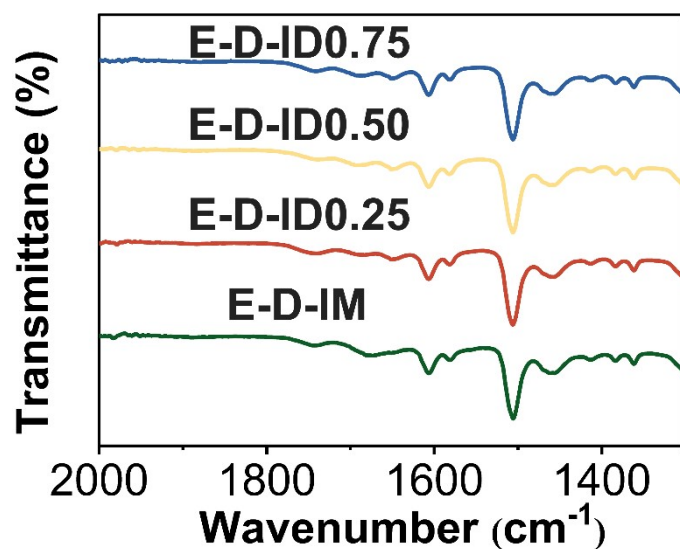

Fig. S33 FTIR spectra of the cured E-D-IM and E-D-IDx.

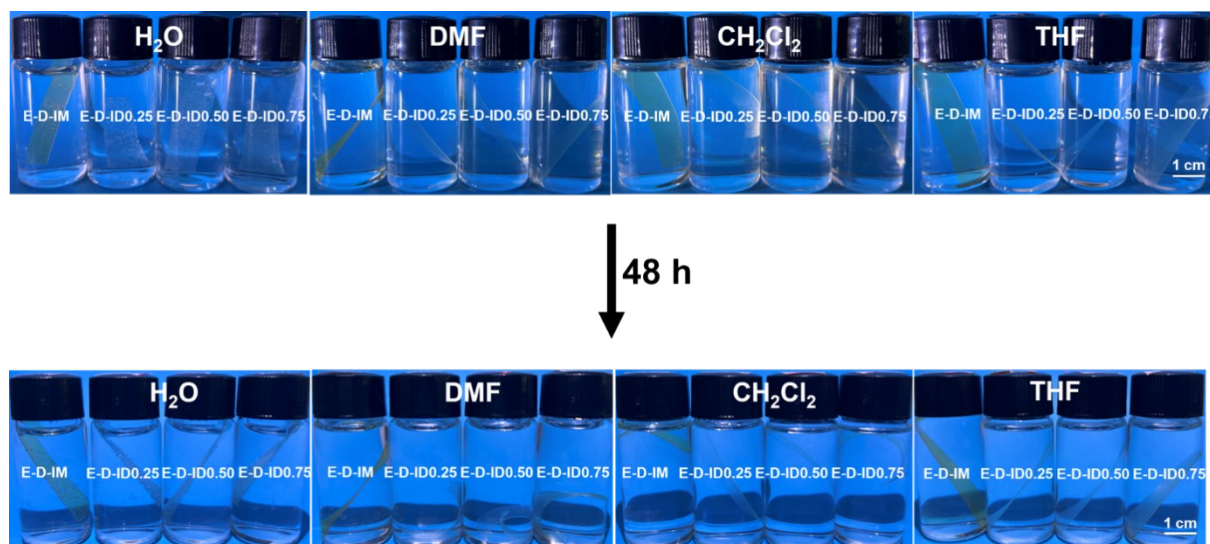

Fig. S34 Solvent uptake test of E-D-IM and E-D-IDx by immersion in different solvents for 48 h.

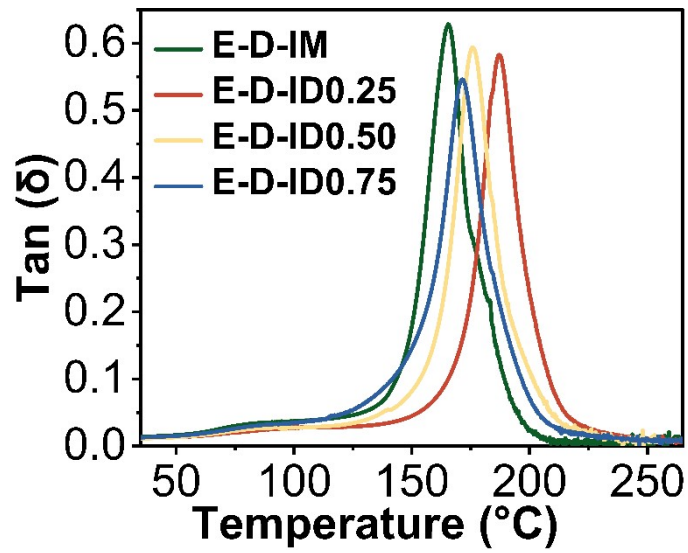

Fig. S35 Plot of  $\tan \delta$  versus temperature.

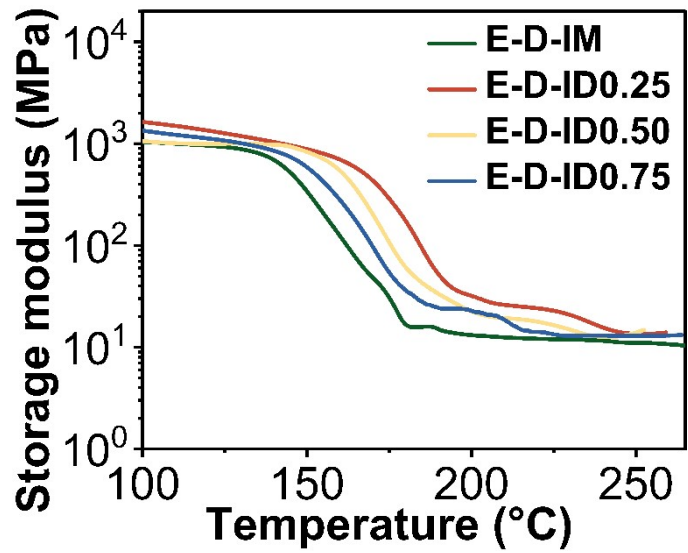

Fig. S36 Plot of storage modulus versus temperature.

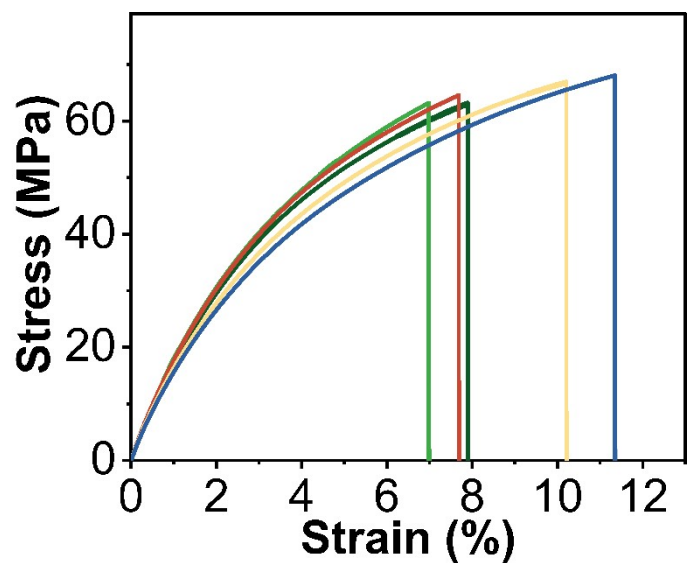

Fig. S37 Tensile stress-strain curves of E-D-IM.

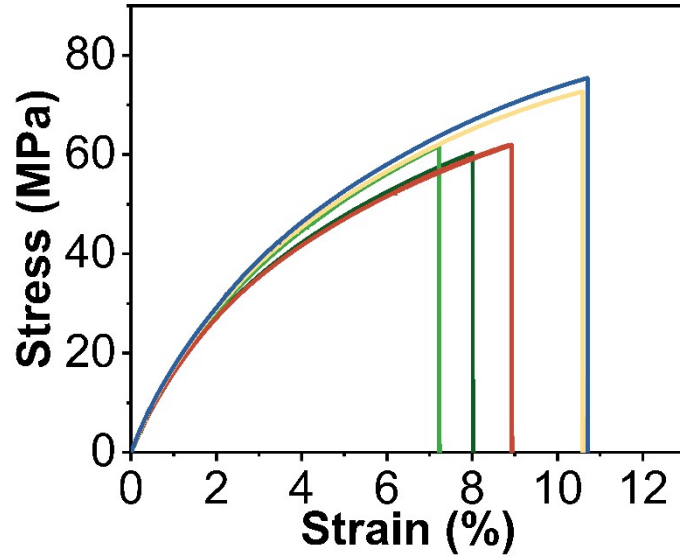

Fig. S38 Tensile stress-strain curves of E-D-ID0.25.

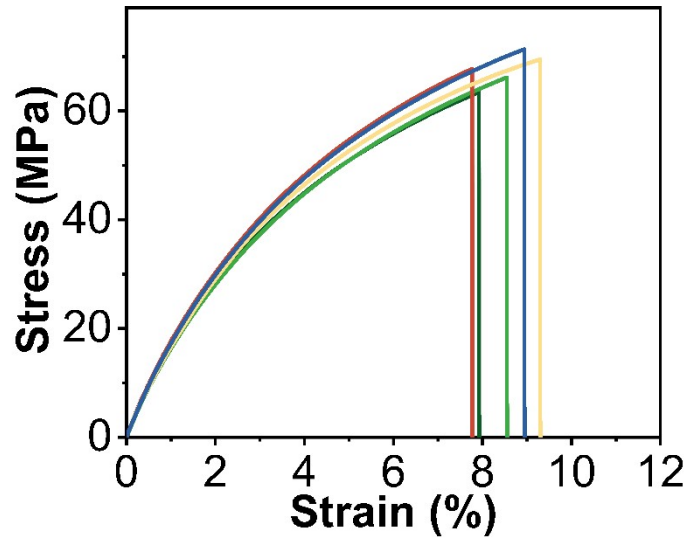

Fig. S39 Tensile stress-strain curves of E-D-ID0.50.

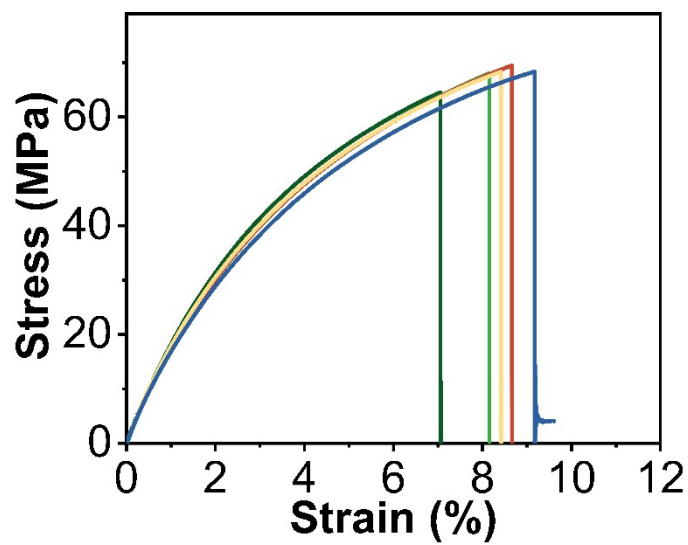

Fig. S40 Tensile stress-strain curves of E-D-ID0.75.
